# Supplementary material
Source: Springer Nature journal article supplement (https://www.springermedizin.de/resource/supplementary/12904_2003_7_MOESM2_ESM.pdf/9517910)
Supplement: MOESM2 [file 9517910]

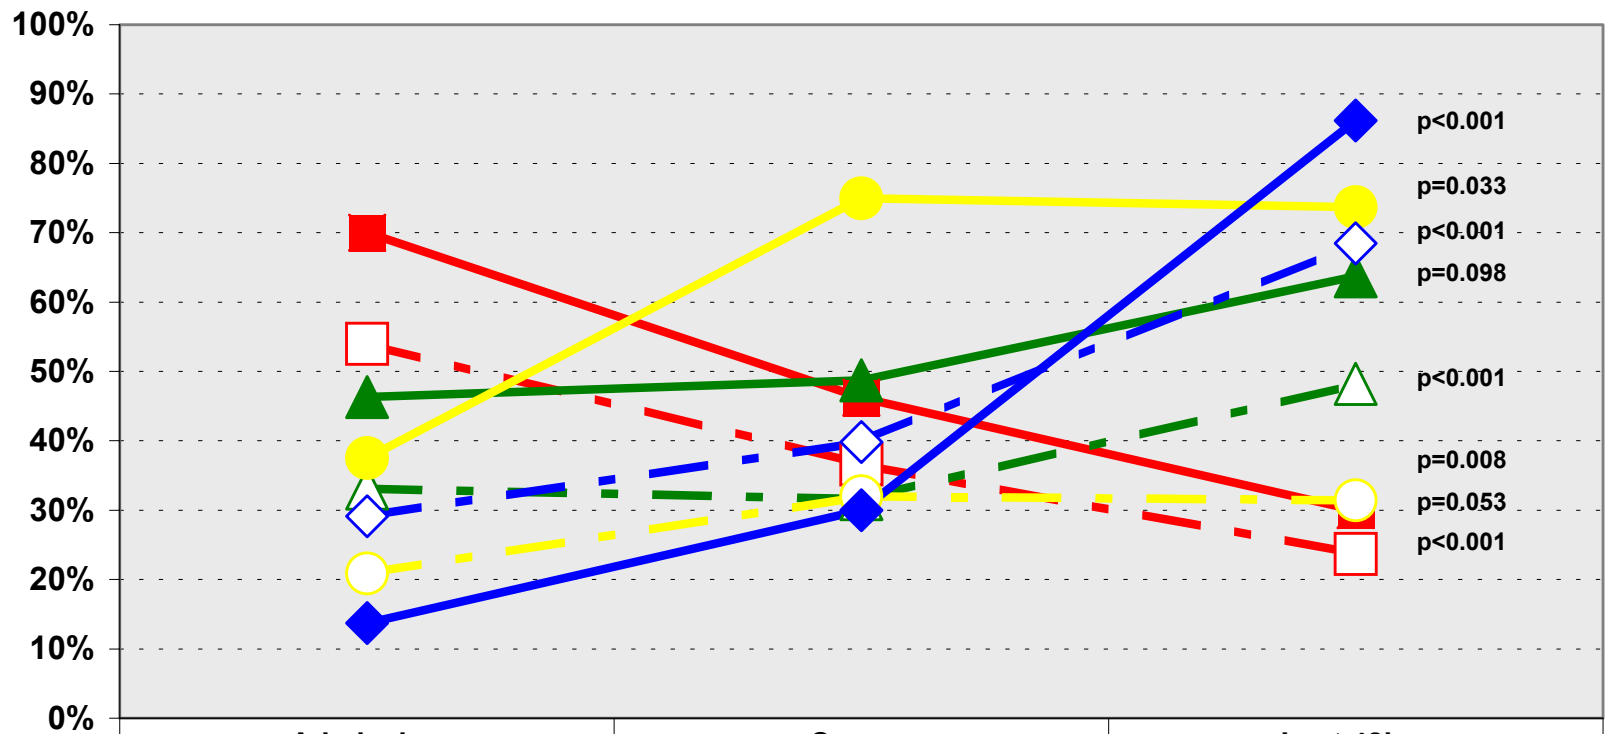

|                                     | Admission | Course | Last 48hrs |
|-------------------------------------|-----------|--------|------------|
| □ Pain A                            | 54,0%     | 36,6%  | 23,7%      |
| ■ Pain B                            | 70,0%     | 46,2%  | 30,0%      |
| △ Dyspnoea A                        | 33,1%     | 31,6%  | 48,2%      |
| ▲ Dyspnoea B                        | 46,3%     | 48,7%  | 63,7%      |
| ○ Psychological distress, anxiety A | 20,9%     | 32,0%  | 31,4%      |
| ● Psychological distress, anxiety B | 37,5%     | 75,0%  | 73,7%      |
| ◇ Cognitive disorder, delirium A    | 29,1%     | 39,8%  | 68,5%      |
| ◆ Cognitive disorder, delirium B    | 13,7%     | 30,0%  | 86,2%      |
